# Supplementary material
Source: PubMed Central journal article supplement (PMC6755032)
Supplement: EMS83221-supplement-1.pdf [file EMS83221-supplement-1.pdf]

## Supplemental Material for:

### Cell wall inhibition in L-forms or via $\beta$ -lactam antibiotics induces reactive oxygen-mediated bacterial killing through increased glycolytic flux

Yoshikazu Kawai<sup>1\*</sup>, Romain Mercier<sup>2</sup>, Katarzyna Mickiewicz<sup>1</sup>, Agnese Serafini<sup>3</sup>, Luiz Pedro Sório de Carvalho<sup>3</sup>, Jeff Errington<sup>1\*</sup>

<sup>1</sup>Centre for Bacterial Cell Biology, Institute for Cell and Molecular Biosciences, Medical School, Newcastle University, Richardson Road, Newcastle upon Tyne NE2 4AX, UK

<sup>2</sup>Laboratoire de Chimie Bactérienne, CNRS-Aix Marseille University UMR 7283, Institut de Microbiologie de la Méditerranée, Marseille, France.

<sup>3</sup>Mycobacterial Metabolism and Antibiotic Research Laboratory, The Francis Crick Institute, 1 Midland Road, London NW1 1AT, UK

\*Corresponding authors

[yoshikazu.kawai@ncl.ac.uk](mailto:yoshikazu.kawai@ncl.ac.uk)

[jeff.errington@ncl.ac.uk](mailto:jeff.errington@ncl.ac.uk)

#### Contents:

Supplementary Figure 1-4, Supplementary Video 1, Supplementary Table 1-3 and Supplementary references.

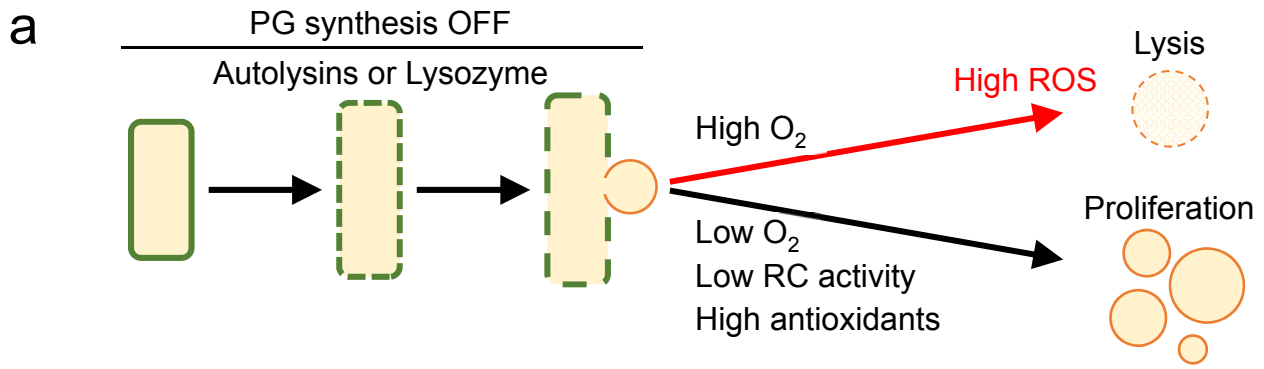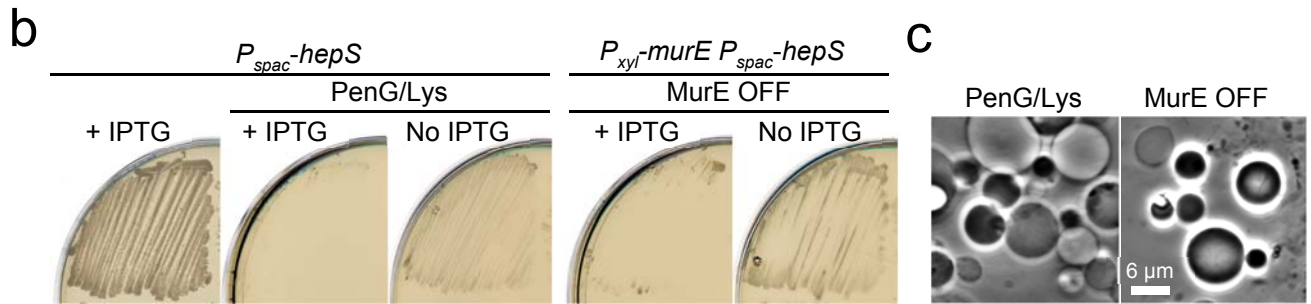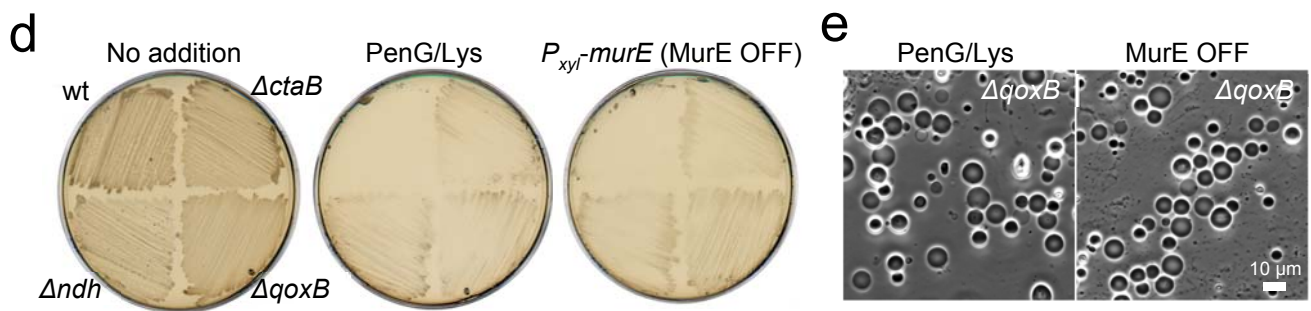

**Supplementary Figure 1. (Related to Figures 1 and 3) Effects of respiratory chain on L-form growth**

**a**, Schematic representation of L-form switch by inhibiting PG precursor pathway in *B. subtilis*. The increase of cellular ROS levels in the wall deficient cells results in cell death and counteraction of the ROS production promotes L-form proliferation.

**b**, *B. subtilis* strains YK1450 ( $P_{spac}$ -*hepS*) and YK1454 ( $P_{xyl}$ -*murE*  $P_{spac}$ -*hepS*) were streaked on NA/sucrose plates with or without 1 mM IPTG in the absence of xylose, and incubated at 30°C.

**c**, Phase contrast micrographs of *B. subtilis* L-forms were taken from the plates shown in panel **b**.

**d**, *B. subtilis* strains 168CA (wild-type), YK1460 (*ctaB*::*Tn*), YK1461 (*ndh*::*Tn*) and YK1462 (*qoxB*::*Tn*) were streaked on NA/sucrose plates with (middle) or without (left) 200 µg/ml PenG and 100 µg/ml chicken egg white lysozyme, and incubated at 30°C. *B. subtilis* strains BS115 ( $P_{xyl}$ -*murE*), YK1816 ( $P_{xyl}$ -*murE* *ndh*::*Tn*), YK1817 ( $P_{xyl}$ -*murE* *qoxB*::*Tn*) and YK1818 ( $P_{xyl}$ -*murE* *ctaB*::*Tn*) were streaked on NA/sucrose plates (no xylose), and incubated at 30°C (right).

**e**, Phase contrast micrographs of *B. subtilis* L-forms with a *qoxB* mutation (YK1817) were taken from the plates shown in panel **d**.

The figures are representative of at least three independent experiments (**b-e**).

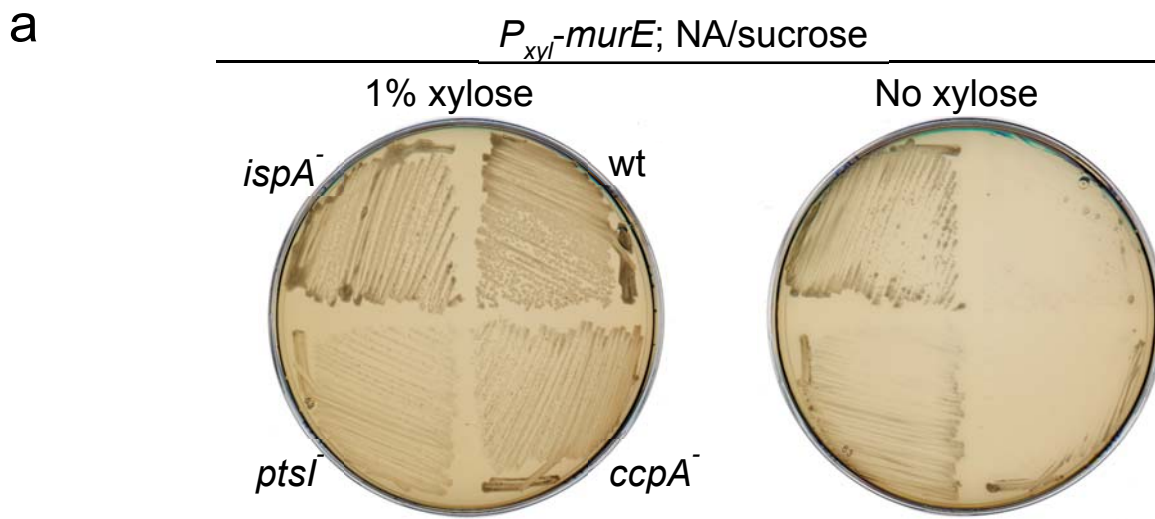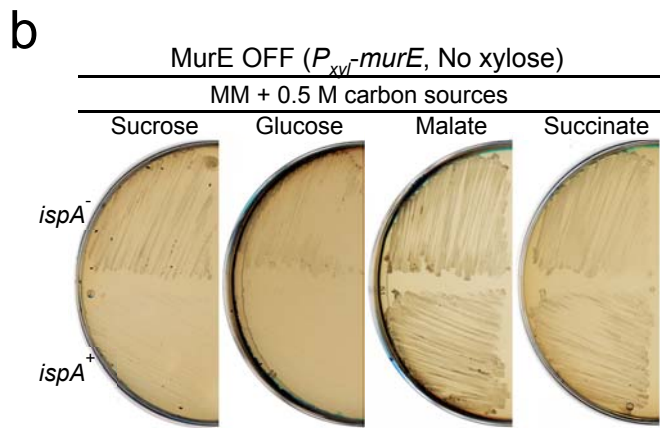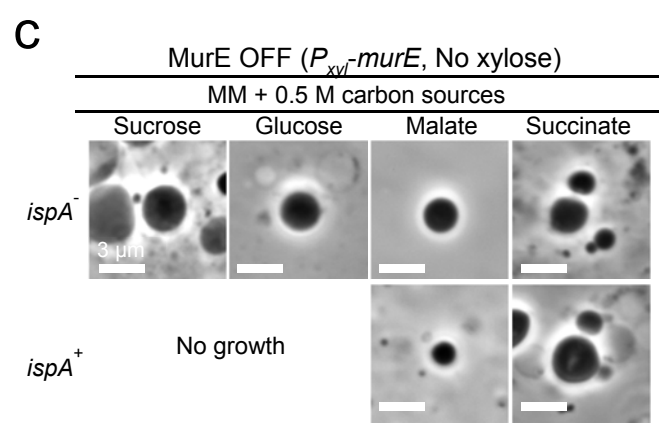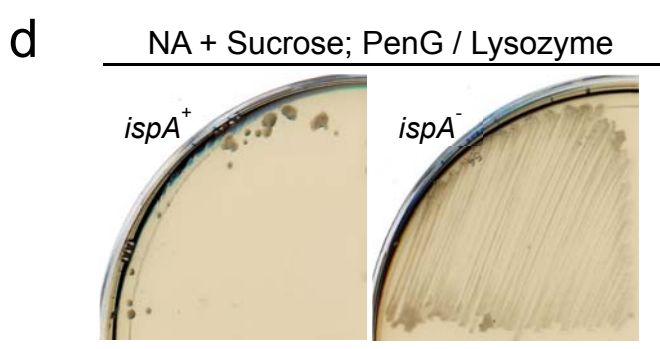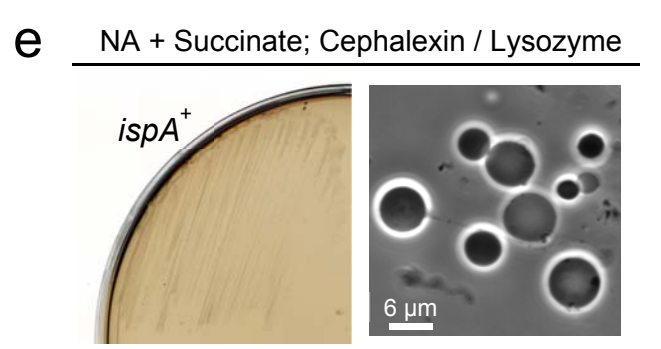

**Supplementary Figure 2. (Related to Figures 2 and 3) Contrasting effects of carbon sources on L-form growth**

**a**, *B. subtilis* strains BS115 ( $P_{xyI^-}murE$ ), LR2 ( $P_{xyI^-}murE\ ispA^-$ ), YK1391 ( $P_{xyI^-}murE\ ccpA::tn$ ) and YK1392 ( $P_{xyI^-}murE\ ptsI::tn$ ) were streaked on NA/sucrose plates with or without 1% xylose, and incubated at 30°C.

**b**, Effects of carbon sources on L-form growth on minimal medium (MM). *B. subtilis* strains BS115 ( $P_{xyI^-}murE\ ispA^+$ ) and LR2 ( $P_{xyI^-}murE\ ispA^-$ ) were streaked on MM plates with 0.5 M various carbon sources (sucrose, glucose, malate or succinate) in the absence of xylose (MurE OFF), and incubated at 30°C.

**c**, Phase contrast micrographs of BS115 or LR2 were taken from the plates shown in panel **b**.

**d**, Effects of an *ispA* mutation on *B. subtilis* L-form growth on sucrose plates containing PenG and lysozyme. *B. subtilis* wild-type strain (168CA;  $murE^+ ispA^+$ ) and RM81 ( $murE^+ ispA^-$ ) were streaked on NA/sucrose plates containing 200 µg/ml PenG and 100 µg/ml chicken egg white lysozyme, and incubated at 30°C for 2-3 days.

**e**, Effects of succinate on *B. subtilis* L-form growth. *B. subtilis* wild-type strain (168CA) was streaked on NA/succinate plates containing 100 µg/ml cephalixin and 100 µg/ml lysozyme, and incubated at 30°C. Phase contrast micrograph of *B. subtilis* L-forms was taken from the plate (left).

The figures are representative of at least three independent experiments (**a-e**).

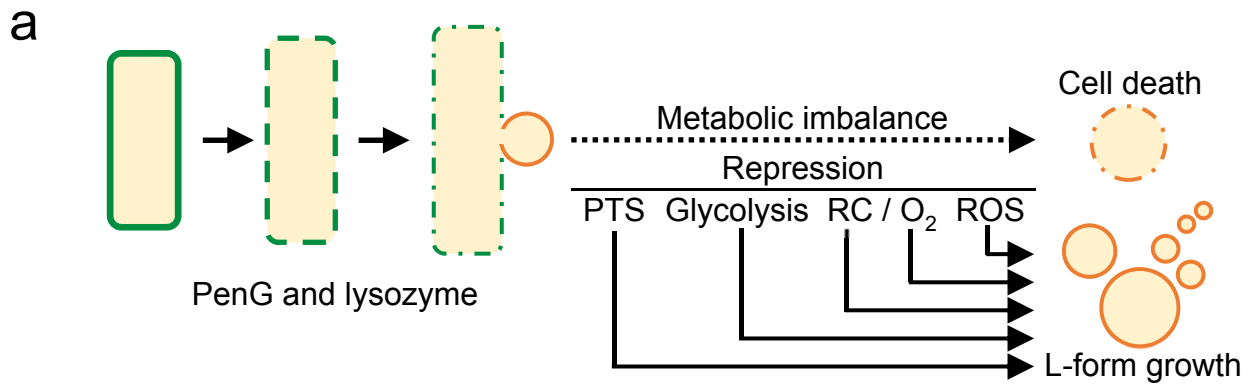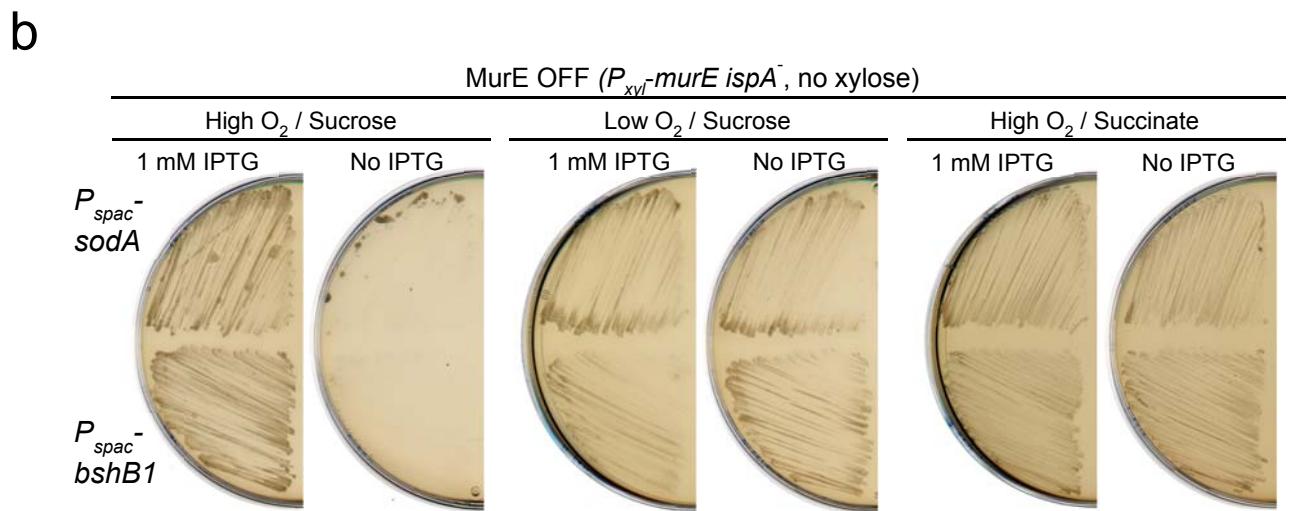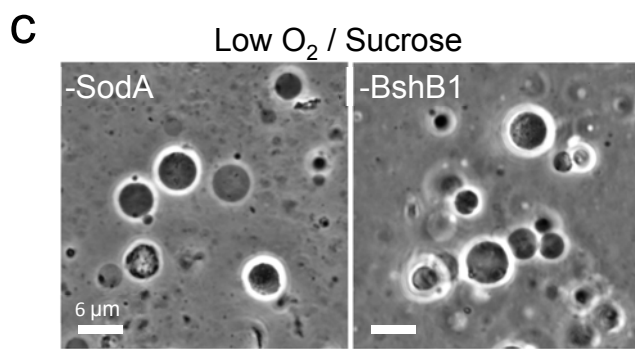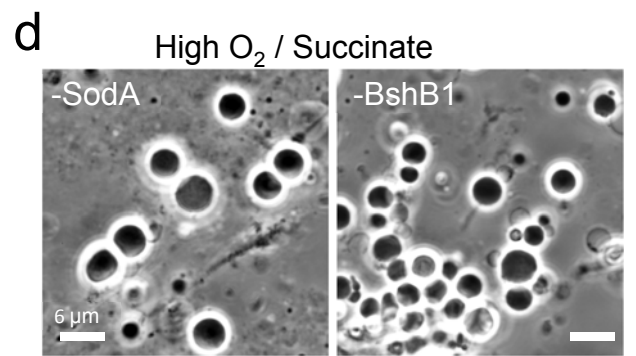

**Supplementary Figure 3. (Related to Figures 3 and 4) Oxidative stress does not prevent L-form growth under gluconeogenic conditions.**

**a**, Schematic representation of L-form death/growth phenotype in *B. subtilis* under glycolytic conditions.

**b**, Effects of oxidative stress on L-form switch and growth under various culture conditions. *B. subtilis* strains YK1604 ( $P_{xyI}$ -*murE* *ispA*- $P_{spac}$ -*bshB1*) and YK2028 ( $P_{xyI}$ -*murE* *ispA*- $P_{spac}$ -*sodA*) were streaked on NA/sucrose or succinate plates with or without IPTG in the absence of xylose (MurE OFF), and incubated at 30°C under aerobic (High O<sub>2</sub>) or anaerobic (Low O<sub>2</sub>) conditions.

**c, d**, Phase contrast micrographs of L-forms were taken from the NA/sucrose (**c**; No IPTG, Low O<sub>2</sub> / Sucrose) or NA/succinate plate (**d**; No IPTG, High O<sub>2</sub> / Succinate) shown in panel **b**.

The figures are representative of at least two independent experiments (**b-d**).

We previously showed that the expression levels of many genes required for defence systems against oxidative stress are higher in *B. subtilis* L-forms than those of parental walled cells in NA/sucrose medium, and also that the several antioxidant systems, such as superoxide dismutase (*sodA*) and bacillithiol synthesis (*bshB1*), are essential for L-form growth<sup>1</sup> (**b**, High O<sub>2</sub> / Sucrose). As anticipated, it turned out that these systems are no longer required for L-form growth under anaerobic conditions (**b, c**, Low O<sub>2</sub> / Sucrose), consistent with the notion that the ROS originate from aerobic respiration. We then examined the possible role of the antioxidant systems on L-form growth in the presence of succinate under aerobic conditions and found that they are not required (**b, d**, High O<sub>2</sub> / Succinate). This suggests that the abnormal increase of ROS in the L-form transition is largely suppressed under gluconeogenic conditions.

### Intracellular bacillithiol levels

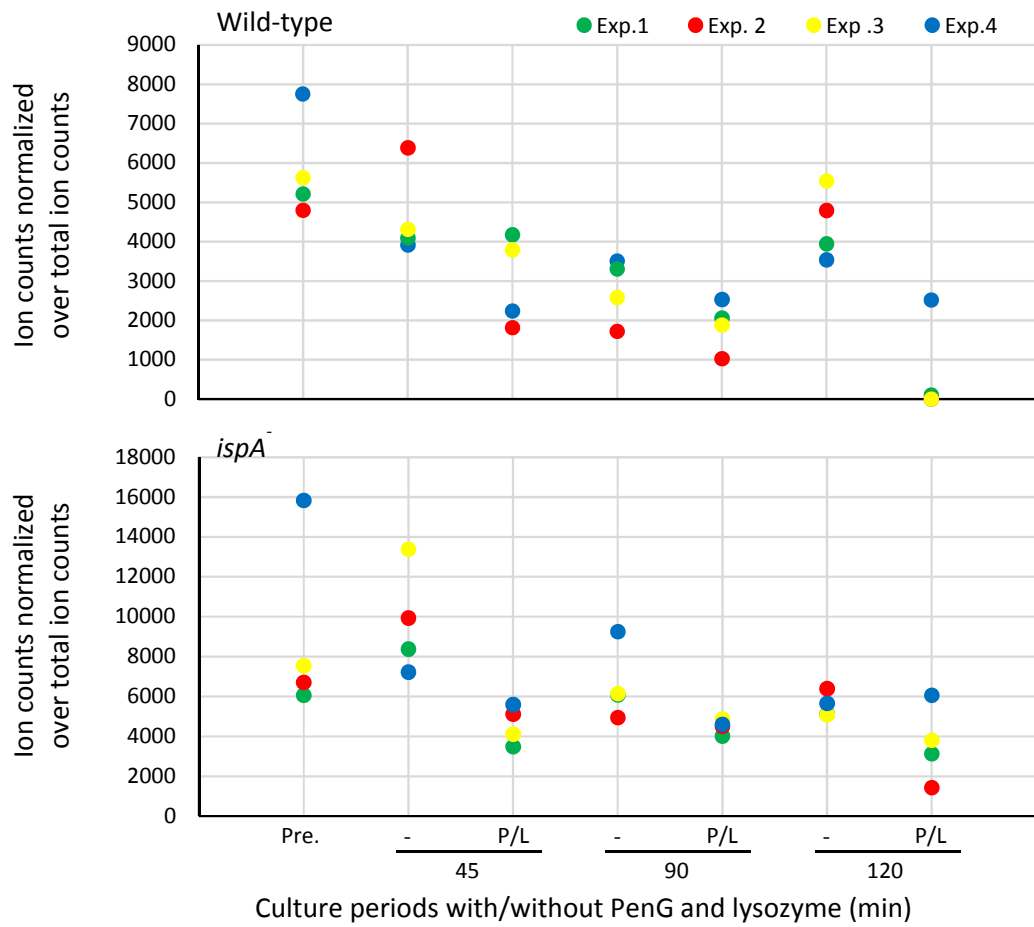



**Supplementary Figure 4. (Related to Figure 4) Effects of the L-form transition on intracellular bacillithiol levels.**

The dot plots show the total pool size of intracellular bacillithiol from  $\sim 10^8$  cells of *B. subtilis* wild-type (168CA) and *ispA*<sup>-</sup> (RM81) cultures on NA/glucose plates with PenG (P) and lysozyme (L). Pre-cultures of *B. subtilis*, before incubation in the presence of labelled glucose, were also analysed (Pre.). The identification of bacillithiol is based on m/z ion counts, which are normalised over total ion counts. The each dots represent the averages from four biological replicates (Exp. 1-4).

**Supplementary Video 1. (Related to Figure 3) Contrasting effects of glucose and succinate on L-form death/growth phenotype**

*B. subtilis* wild-type cells (strain 168CA) were imaged in NB/glucose (left) or succinate (right) with 0.2% agar in the presence of PenG and lysozyme. PC images were acquired every 5 min (Numbers in the top right corner). The movie displayed at 5 frames per second. Scale bar represents 5  $\mu$ m. The figures are representative of at least two independent experiments.

**Supplementary Table 1. (Related to Figure 4) Secreted succinate levels under glycolytic conditions in the presence or absence of PenG and lysozyme**

|                 | $\mu$ M/total ions counts* $10^9$ (standard deviation) <sup>a</sup> |                   |                                        |                   |
|-----------------|---------------------------------------------------------------------|-------------------|----------------------------------------|-------------------|
|                 | Wild-type (strain 168CA)                                            |                   | <i>ispA</i> <sup>-</sup> (strain RM81) |                   |
| Time (min)      | No addition                                                         | PenG and lysozyme | No addition                            | PenG and lysozyme |
| 0 (pre-culture) | 0.5795 (0.0259)                                                     | -                 | 0.8079 (0.0413)                        | -                 |
| 45              | 0.6531 (0.0353)                                                     | 0.2810 (0.0103)   | 0.8211 (0.0567)                        | 0.2975 (0.0076)   |
| 90              | 0.6218 (0.0455)                                                     | 0.2446 (0.0129)   | 0.7878 (0.0563)                        | 0.2921 (0.0093)   |
| 120             | 0.6316 (0.0273)                                                     | 0.2283 (0.0128)   | 0.7587 (0.0500)                        | 0.2638 (0.0148)   |

<sup>a</sup>The averages and the standard deviation of succinate concentrations in  $\sim 10^8$  cells of wild-type or *ispA* mutant from at least three biological replicates were shown. The samples were identical used for extracellular pyruvate analysis (Fig. 4B)

**Supplementary Table 2. (Related to Figure 5) Total viable *S. aureus* cells counts (CFU/ml) under various growth conditions**

|                                  | Experiment 1 <sup>a</sup> |                   | Experiment 2      |                   |
|----------------------------------|---------------------------|-------------------|-------------------|-------------------|
| Time after addition of PenG (hr) | NB/Glucose                | NB/Succinate      | NB/Glucose        | NB/Succinate      |
| 0                                | $1.8 \times 10^8$         | $1.7 \times 10^8$ | $3.2 \times 10^8$ | $2.2 \times 10^8$ |
| 1                                | $9.8 \times 10^7$         | $1.1 \times 10^8$ | $1.8 \times 10^8$ | $1.8 \times 10^8$ |
| 3                                | $6.5 \times 10^7$         | $1.1 \times 10^8$ | $9.2 \times 10^7$ | $1.6 \times 10^8$ |
| 5                                | $3.4 \times 10^7$         | $1.1 \times 10^8$ | $2.6 \times 10^7$ | $6.2 \times 10^7$ |
| 24                               | $7.0 \times 10^4$         | $7.1 \times 10^7$ | $5.0 \times 10^5$ | $4.0 \times 10^7$ |

<sup>a</sup>The data from Experiment 1 was used to generate figure 5E.

**Supplementary Table 3. Bacterial strains, oligonucleotides and plasmids**

| <b>Bacterial strains</b>                                                                                |              |
|---------------------------------------------------------------------------------------------------------|--------------|
| <i>Bacillus subtilis</i>                                                                                |              |
| 168CA; <i>trpC2</i> (wild-type)                                                                         | Lab. stock   |
| RM81; 168CA <i>xseB::Tn kan (ispA<sup>-</sup>)</i>                                                      | 2            |
| BS115; 168CA $\Omega$ <i>spoVD::cat P<sub>xyI</sub>-murE <math>\Omega</math>amyE::(tet xylR)</i>        | 3            |
| LR2; BS115 <i>xseB*</i> (Frameshift 22T>-) ( <i>ispA<sup>-</sup></i> )                                  | 2            |
| BS116; 168CA $\Omega$ <i>spoVD::spc P<sub>xyI</sub>-murE <math>\Omega</math>amyE::(tet xylR)</i>        | Lab. stock   |
| YK1450; 168CA $\Omega$ <i>hepS::pMutin4-erm P<sub>spac</sub>-hepS</i>                                   | {Kawai 2015} |
| YK1454; BS116 $\Omega$ <i>hepS::pMutin4-erm P<sub>spac</sub>-hepS</i>                                   | {Kawai 2015} |
| YK1391; BS115 <i>ccpA::Tn kan</i>                                                                       | 4            |
| YK1392; BS115 <i>ptsI::Tn kan</i>                                                                       | 4            |
| YK1460; 168CA <i>ctaB::Tn kan</i>                                                                       | {Kawai 2015} |
| YK1461; 168CA <i>ndh::Tn kan</i>                                                                        | {Kawai 2015} |
| YK1462; 168CA <i>qoxB::Tn kan</i>                                                                       | {Kawai 2015} |
| YK1563; LR2 $\Omega$ <i>glmM::pMutin4-erm P<sub>spac</sub>-glmM</i>                                     | This work    |
| YK1571; BS115 $\Omega$ <i>gapA::pMutin4-erm P<sub>spac</sub>-gapA</i>                                   | This work    |
| YK1601; BS115 $\Omega$ <i>ptsHI::pMutin4-erm P<sub>spac</sub>-ptsHI</i>                                 | This work    |
| YK1602; BS115 $\Omega$ <i>ptsG::pMutin4-erm <math>\Delta</math>ptsG</i>                                 | This work    |
| YK1604; LR2 $\Omega$ <i>bshB1::pMutin4-erm P<sub>spac</sub>-bshB1</i>                                   | 1            |
| YK1621; BS116 $\Omega$ <i>gapA::pMutin4-erm P<sub>spac</sub>-gapA amyE::P<sub>spacHY</sub>-gapA cat</i> | This work    |
| YK1763; YK1563 <i>ndh::Tn kan</i>                                                                       | {Kawai 2015} |
| YK1764; YK1563 <i>qoxB::Tn kan</i>                                                                      | {Kawai 2015} |
| YK1765; YK1563 <i>ctaB::Tn kan</i>                                                                      | {Kawai 2015} |
| YK1816; BS115 <i>ndh::Tn kan</i>                                                                        | {Kawai 2015} |
| YK1817; BS115 <i>qoxB::Tn kan</i>                                                                       | {Kawai 2015} |
| YK1818; BS115 <i>ctaB::Tn kan</i>                                                                       | {Kawai 2015} |
| YK1995; YK1563 <i>mhqR::Tn kan</i>                                                                      | {Kawai 2015} |
| YK2028; LR2 $\Omega$ <i>sodA::pMutin4-erm P<sub>spac</sub>-sodA</i>                                     | 1            |
| YK2124; BS115 $\Omega$ <i>sacP::pMutin4-erm <math>\Delta</math>sacP</i>                                 | This work    |
| YK2125; BS115 $\Omega$ <i>fruA::pMutin4-erm <math>\Delta</math>fruA</i>                                 | This work    |
| YK2126; BS115 $\Omega$ <i>levD::pMutin4-erm <math>\Delta</math>levD</i>                                 | This work    |
| <i>Listeria monocytogenes</i>                                                                           |              |
| EDGe                                                                                                    | 5            |
| EDGe $\Delta$ <i>oatA<math>\Delta</math>pgdA</i>                                                        | 5            |
| <i>Staphylococcus aureus</i>                                                                            |              |
| RN4220                                                                                                  | 6            |
| <i>Enterococcus faecium</i>                                                                             |              |
| ATCC19434                                                                                               | Lab. stock   |
| <b>Oligonucleotides</b>                                                                                 |              |
| pM4SD-gapA-F; GGGGAATTCTCTCACTTATTTAAAGGAG                                                              | This work    |
| pM4-gapA-R; GGGGGATCCAACGCCTTGTGGCCCCAG                                                                 | This work    |
| pPL82-gapA-F; TCTTCTAGATCTCTCACTTATTTAAAGG                                                              | This work    |
| pPL82-gapA-R; GCAGCATGCTCGAAAGAACCAAGTCAGG                                                              | This work    |
| pM4SD-ptsHI-F; GAAGAATTCAAGCTTTAAGTTAAAAGGAG                                                            | This work    |
| pM4-ptsHI-R; GGAGGATCCTTAGCGATACCTAAAGAC                                                                | This work    |
| pM4-ptsG-F; GAAGAATTC GGTCCTGCATTTCTTGAG                                                                | This work    |
| pM4-ptsG-R; GGAGGATCCATAATACCGCCGAACACC                                                                 | This work    |
| pM4-sacP-F; GAAGAATTCTTATCAGCGCGGCTCATTG                                                                | This work    |

|                                               |           |
|-----------------------------------------------|-----------|
| pM4-sacP-R; GGAGGATCCTTAATAGGCCGCTGGCTAC      | This work |
| pM4-fruA-F; GAAGAATTCGTCAGTCTTGATAAGG         | This work |
| pM4-fruA-R; GGAGGATCCTTCAGACTCAGCTTCAAGG      | This work |
| pM4-levD-F; GAAGAATTCATTATCAGCGGTCATGGAG      | This work |
| pM4-levD-R; GGAGGATCCAAGCTGCCGCTTATATGG       | This work |
| pM4SD-glmM-F; GGGGAATTCAAAGGAGCGATTATAAAATGGG | This work |
| pM4-glmM-R; GGGGGATCCCCGCCTCTGCATCCATCG       | This work |
| <b>Plasmids</b>                               |           |
| pMutin4                                       | 7         |
| pM4- <i>P<sub>spac</sub>-gapA</i>             | This work |
| pM4- <i>P<sub>spac</sub>-ptsHI</i>            | This work |
| pM4- $\Delta$ <i>ptsG</i>                     | This work |
| pM4- $\Delta$ <i>sacP</i>                     | This work |
| pM4- $\Delta$ <i>fruA</i>                     | This work |
| pM4- $\Delta$ <i>levD</i>                     | This work |
| pM4- <i>P<sub>spac</sub>-glmM</i>             | This work |
| pPL82                                         | 8         |
| pPL82- <i>P<sub>spacHY</sub>-gapA</i>         | This work |

## Supplementary References

- 1 Kawai, Y. *et al.* Cell growth of wall-free L-form bacteria is limited by oxidative damage. *Curr. Biol.* **25**, 1613-1618, doi:10.1016/j.cub.2015.04.031 (2015).
- 2 Mercier, R., Kawai, Y. & Errington, J. Excess membrane synthesis drives a primitive mode of cell proliferation. *Cell* **152**, 997-1007, doi:10.1016/j.cell.2013.01.043 (2013).
- 3 Leaver, M., Dominguez-Cuevas, P., Coxhead, J. M., Daniel, R. A. & Errington, J. Life without a wall or division machine in *Bacillus subtilis*. *Nature* **457**, 849-853, doi:10.1038/nature07742 (2009).
- 4 Kawai, Y., Daniel, R. A. & Errington, J. Regulation of cell wall morphogenesis in *Bacillus subtilis* by recruitment of PBP1 to the MreB helix. *Mol. Microbiol.* **71**, 1131-1144, doi:10.1111/j.1365-2958.2009.06601.x (2009).
- 5 Aubry, C. *et al.* OatA, a peptidoglycan O-acetyltransferase involved in *Listeria monocytogenes* immune escape, is critical for virulence. *J. Infect. Dis.* **204**, 731-740, doi:10.1093/infdis/jir396 (2011).
- 6 Kreiswirth, B. N. *et al.* The toxic shock syndrome exotoxin structural gene is not detectably transmitted by a prophage. *Nature* **305**, 709-712 (1983).
- 7 Vagner, V., Dervyn, E. & Ehrlich, S. D. A vector for systematic gene inactivation in *Bacillus subtilis*. *Microbiology* **144** ( Pt 11), 3097-3104, doi:10.1099/00221287-144-11-3097 (1998).
- 8 Quisel, J. D., Burkholder, W. F. & Grossman, A. D. In vivo effects of sporulation kinases on mutant Spo0A proteins in *Bacillus subtilis*. *J. Bacteriol.* **183**, 6573-6578, doi:10.1128/JB.183.22.6573-6578.2001 (2001).
